# Supplementary material
Source: PubMed Central journal article supplement (PMC5786429)

**Supplemental Table 1.** ABCA4 patient cohort with pathogenic ABCA4 changes and the c.5603A>T (p.Asn1868Ile) status. Nucleotide positions and protein translation correspond to CCDS747.1 and NP\_000341.2, respectively. Nucleotide numbering uses the A of the ATG translation initiation start site as nucleotide 1.

| PATIENT # | segregation of variants performed | Age of Onset | Foveal Sparing | ABCA4 disease alleles | c.5603A>T (p.Asn1868Ile) genotype | ABCA4 locus seq | ABCA4 pathogenic variant                        | ABCA4 pathogenic variant                        |
|-----------|-----------------------------------|--------------|----------------|-----------------------|-----------------------------------|-----------------|-------------------------------------------------|-------------------------------------------------|
| 3007      | x                                 |              |                | 2                     | ++                                |                 | c.2588G>C (p.Gly863Ala)                         | c.5461-10T>C (p.?)                              |
| 3807      | x                                 | 51           | N              | 2                     | ++                                |                 | c.2588G>C (p.Gly863Ala)                         | c.5461-10T>C (p.?)                              |
| 3306      |                                   |              |                | 2                     | ++                                |                 | c.2588G>C (p.Gly863Ala)                         | c.5461-10T>C (p.?)                              |
| 3465      |                                   | 10           | N              | 2                     | ++                                |                 | c.2588G>C (p.Gly863Ala)                         | c.5461-10T>C (p.?)                              |
| 3334      |                                   |              |                | 2                     | ++                                |                 | c.2588G>C (p.Gly863Ala)                         | c.5461-10T>C (p.?)                              |
| 3467      |                                   | 33           |                | 2                     | ++                                |                 | c.6191C>T (p.Ala2064Val)                        | c.6191C>T (p.Ala2064Val)                        |
| 4247      |                                   |              |                | 2                     | ++                                |                 | c.4594G>A (p.Asp1532Asn)                        | c.4594G>A (p.Asp1532Asn)                        |
| 3356      |                                   | 41           | N              | 2                     | ++                                |                 | c.2588G>C (p.Gly863Ala)                         | c.2588G>C (p.Gly863Ala )                        |
| 3122      | x                                 | 32           | Y              | 2                     | ++                                |                 | c.2588G>C (p.Gly863Ala)                         | c.2588G>C (p.Gly863Ala )                        |
| 3341      |                                   | 35           | Y              | 2                     | ++                                |                 | c.2588G>C (p.Gly863Ala)                         | c.5177C>A (p.Thr1726Asn)                        |
| 3611      | x                                 |              |                | 2                     | +/-                               |                 | c.[1715G>A;2588G>C] (p.[Arg572Gln;Gly863Ala])   | c.5898+1G>A (p.?)                               |
| 3597      |                                   | 21           | N              | 2                     | +/-                               |                 | c.[2549A>G;5882G>A] (p.[Tyr850Cys;Gly1961Glu])  | c.5461-10T>C (p.?)                              |
| 3408      | x                                 | 18           | N              | 2                     | +/-                               | x               | c.5882G>A (p.Gly1961Glu)                        | c.2160+584A>G (p.?)                             |
| 3269      |                                   | 60           | Y              | 2                     | +/-                               | x               | c.2588G>C (p.Gly863Ala)                         | c.4539+2028C>T (p.?)                            |
| 3179      | x                                 |              |                | 2                     | +/-                               |                 | c.[1622T>C;3113C>T] (p.[Leu541Pro;Ala1038Val])  | c.5018+5G>A (p.?)                               |
| 3358      |                                   |              |                | 2                     | +/-                               |                 | c.[1622T>C;3113C>T] (p.[Leu541Pro;Ala1038Val])  | c.5461-10T>C (p.?)                              |
| 3084      | x                                 |              |                | 2                     | +/-                               |                 | c.[4222T>C;4918C>T] (p.[Trp1408Arg;Arg1640Trp]) | c.5461-10T>C (p.?)                              |
| 3427      |                                   | 16           | N              | 2                     | +/-                               |                 | c.1592A>G (p.Glu531Gly)                         | c.5461-10T>C (p.?)                              |
| 3336      | x                                 |              |                | 2                     | +/-                               |                 | c.161G>A (p.Cys54Tyr)                           | c.5461-10T>C (p.?)                              |
| 3837      | x                                 | 11           | N              | 2                     | +/-                               |                 | c.1648G>A (p.Gly550Arg)                         | c.5461-10T>C (p.?)                              |
| 3250      |                                   |              |                | 2                     | +/-                               |                 | c.3292C>T (p.Arg1098Cys)                        | c.5461-10T>C (p.?)                              |
| 3347      |                                   |              |                | 2                     | +/-                               |                 | c.3322C>T (p.Arg1108Cys)                        | c.5461-10T>C (p.?)                              |
| 3546      |                                   |              |                | 2                     | +/-                               |                 | c.4139C>T (p.Pro1380Leu)                        | c.5461-10T>C (p.?)                              |
| 3839      | x                                 | 9            | Y              | 2                     | +/-                               |                 | c.4139C>T (p.Pro1380Leu)                        | c.5461-10T>C (p.?)                              |
| 7565      |                                   |              |                | 2                     | +/-                               |                 | c.4139C>T (p.Pro1380Leu)                        | c.5461-10T>C (p.?)                              |
| 3186      |                                   |              |                | 2                     | +/-                               |                 | c.4139C>T (p.Pro1380Leu)                        | c.5461-10T>C (p.?)                              |
| 3303      | x                                 |              |                | 2                     | +/-                               |                 | c.5882G>A (p.Gly1961Glu)                        | c.5461-10T>C (p.?)                              |
| 3284      | x                                 | 10           | N              | 2                     | +/-                               |                 | c.5461-10T>C (p.?)                              | c.5714+5G>A (p.?)                               |
| 3342      | x                                 |              |                | 2                     | +/-                               |                 | c.5461-10T>C (p.?)                              | c.5714+5G>A (p.?)                               |
| 3004      | x                                 |              |                | 2                     | +/-                               |                 | c.4469G>A (p.Cys1490Tyr)                        | c.5714+5G>A (p.?)                               |
| 5020      | x                                 |              |                | 2                     | +/-                               |                 | c.770T>G (p.Leu257Arg)                          | c.5714+5G>A (p.?)                               |
| 3857      |                                   |              |                | 2                     | +/-                               |                 | c.2588G>C (p.Gly863Ala)                         | c.5898+1G>A (p.?)                               |
| 4581      |                                   | 45           | N              | 2                     | +/-                               |                 | c.5461-10T>C (p.?)                              | c.6006-609T>A (p.?)                             |
| 3063      | x                                 |              |                | 2                     | +/-                               |                 | c.[1715G>A;2588G>C] (p.[Arg572Gln;Gly863Ala])   | c.[3322C>T;6320G>A] (p.[Arg1108Cys;Arg2107His]) |
| 3595      | x                                 |              | Y              | 2                     | +/-                               |                 | c.1805G>A (p.Arg602Gln)                         | c.4469G>A (p.Cys1490Tyr)                        |

|      |   |    |   |   |     |   |                                                |                          |
|------|---|----|---|---|-----|---|------------------------------------------------|--------------------------|
| 3129 |   |    | Y | 2 | +/- |   | c.3113C>T (p.Ala1038Val)                       | c.4469G>A (p.Cys1490Tyr) |
| 3003 |   |    |   | 2 | +/- |   | c.2588G>C (p.Gly863Ala)                        | c.4506C>A (p.Cys1502*)   |
| 3738 |   | 25 | N | 2 | +/- |   | c.3050+5G>A (p.?)                              | c.4594G>A (p.Asp1532Asn) |
| 3204 |   | 18 | N | 2 | +/- |   | c.4139C>T (p.Pro1380Leu)                       | c.4594G>A (p.Asp1532Asn) |
| 3077 |   |    |   | 2 | +/- |   | c.4139C>T (p.Pro1380Leu)                       | c.4594G>A (p.Asp1532Asn) |
| Y703 |   |    |   | 2 | +/- |   | c.454C>T (p.Arg152*)                           | c.4594G>A (p.Asp1532Asn) |
| 3553 |   |    |   | 2 | +/- |   | c.2588G>C (p.Gly863Ala)                        | c.6286G>A (p.Glu2096Lys) |
| 3104 |   |    |   | 2 | +/- |   | c.5461-10T>C (p.?)                             | c.5882G>A (p.Gly1961Glu) |
| Y647 |   |    |   | 2 | +/- |   | c.5461-10T>C (p.?)                             | c.5882G>A (p.Gly1961Glu) |
| 3332 |   | 23 | N | 2 | +/- |   | c.5461-10T>C (p.?)                             | c.5882G>A (p.Gly1961Glu) |
| 3747 |   | 17 | N | 2 | +/- |   | c.5461-10T>C (p.?)                             | c.5882G>A (p.Gly1961Glu) |
| 3021 |   |    |   | 2 | +/- |   | c.3322C>T (p.Arg1108Cys)                       | c.5882G>A (p.Gly1961Glu) |
| 3458 |   | 13 | N | 2 | +/- |   | c.4216C>T (p.His1406Tyr)                       | c.5882G>A (p.Gly1961Glu) |
| 3946 |   | 42 | Y | 2 | +/- | x | c.4216C>T (p.His1406Tyr)                       | c.5882G>A (p.Gly1961Glu) |
| 3635 |   | 17 | Y | 2 | +/- |   | c.4469G>A (p.Cys1490Tyr)                       | c.5882G>A (p.Gly1961Glu) |
| 3473 | x |    | Y | 2 | +/- |   | c.4469G>A (p.Cys1490Tyr)                       | c.5882G>A (p.Gly1961Glu) |
| 2020 | x | 55 | Y | 2 | +/- |   | c.4594G>A (p.Asp1532Asn)                       | c.5882G>A (p.Gly1961Glu) |
| 3724 |   | 58 | Y | 2 | +/- |   | c.4594G>A (p.Asp1532Asn)                       | c.5882G>A (p.Gly1961Glu) |
| 4351 | x | 12 | Y | 2 | +/- | x | c.5318C>T (p.Ala1773Val)                       | c.5882G>A (p.Gly1961Glu) |
| 3508 |   | 38 | Y | 2 | +/- |   | c.67-2A>G (p.?)                                | c.2588G>C (p.Gly863Ala ) |
| 3009 |   |    |   | 2 | +/- |   | c.768G>T (p.?)                                 | c.2588G>C (p.Gly863Ala ) |
| 3125 |   |    |   | 2 | +/- |   | c.1015T>G (p.Trp339Gly)                        | c.2588G>C (p.Gly863Ala ) |
| 3345 |   |    |   | 2 | +/- |   | c.1574T>C (p.Phe525Ser)                        | c.2588G>C (p.Gly863Ala ) |
| 9026 | x | 22 | N | 2 | +/- | x | c.1819G>A (p.Gly607Arg)                        | c.2588G>C (p.Gly863Ala ) |
| 3691 |   |    | N | 2 | +/- |   | c.1849C>T (p.Gln617*)                          | c.2588G>C (p.Gly863Ala ) |
| 3787 |   | 21 | Y | 2 | +/- |   | c.1921T>G (p.Cys641Gly)                        | c.2588G>C (p.Gly863Ala ) |
| 3454 |   |    |   | 2 | +/- |   | c.1964T>G (p.Phe655Cys)                        | c.2588G>C (p.Gly863Ala ) |
| 3264 |   |    |   | 2 | +/- |   | c.318T>G (p.Tyr106*)                           | c.2588G>C (p.Gly863Ala ) |
| 3366 | x | 5  |   | 2 | +/- |   | c.5572T>A (p.Tyr1858Asn)                       | c.5822A>C (p.His1941Pro) |
| 3255 |   | 18 | N | 2 | +/- |   | c.[1622T>C;3113C>T] (p.[Leu541Pro;Ala1038Val]) | c.5537T>C (p.Ile1846Thr) |
| 3101 |   |    |   | 2 | +/- |   | c.5461-10T>C (p.?)                             | c.6079C>T (p.Leu2027Phe) |
| 3298 | x | 11 | N | 2 | +/- |   | c.2552G>A (p.Gly851Asp)                        | c.6079C>T (p.Leu2027Phe) |
| 3155 |   |    | Y | 2 | +/- |   | c.1253T>C (p.Phe418Ser)                        | c.4326C>A (p.Asn1442Lys) |
| 3800 |   | 18 | N | 2 | +/- |   | c.2588G>C (p.Gly863Ala)                        | c.3085C>T (p.Gln1029*)   |
| 3216 | x |    |   | 2 | +/- |   | c.2588G>C (p.Gly863Ala)                        | c.4234C>T (p.Gln1412*)   |
| 3292 |   |    | N | 2 | +/- |   | c.2894A>G (p.Asn965Ser)                        | c.5138A>G (p.Gln1713Arg) |
| 5007 | x | 5  | N | 2 | +/- |   | c.4537del (p.Gln1513fs)                        | c.319C>T (p.Arg107*)     |
| 4563 | x | 48 | N | 2 | +/- |   | c.2588G>C (p.Gly863Ala)                        | c.3322C>T (p.Arg1108Cys) |
| 3237 | x | 9  | N | 2 | +/- |   | c.1253T>C (p.Phe418Ser)                        | c.3322C>T (p.Arg1108Cys) |
| 3070 |   |    |   | 2 | +/- |   | c.2588G>C (p.Gly863Ala)                        | c.4919G>A (p.Arg1640Gln) |
| 3965 | x | 12 | N | 2 | +/- | x | c.2564G>A (p.Trp855*)                          | c.5114G>A (p.Arg1705Gln) |

|      |   |    |   |   |     |   |                                                 |  |                                                 |
|------|---|----|---|---|-----|---|-------------------------------------------------|--|-------------------------------------------------|
| 3648 | x |    |   | 2 | +/- |   | c.2588G>C (p.Gly863Ala)                         |  | c.5778_5779del (p.Arg1927fs)                    |
| 3865 | x |    | Y | 2 | +/- |   | c.4469G>A (p.Cys1490Tyr)                        |  | c.6089G>A (p.Arg2030Gln)                        |
| 4514 |   | 7  | N | 2 | +/- |   | c.[2041C>T;2588G>C] (p.[Arg681*;Gly863Ala])     |  | c.6088C>T (p.Arg2030*)                          |
| 3981 |   |    |   | 2 | +/- |   | c.2588G>C (p.Gly863Ala)                         |  | c.6088C>T (p.Arg2030*)                          |
| 3400 |   |    |   | 2 | +/- |   | c.5461-10T>C (p.?)                              |  | c.6119G>A (p.Arg2040Gln)                        |
| 3902 |   | 50 | Y | 2 | +/- |   | c.1957C>T (p.Arg653Cys)                         |  | c.1957C>T (p.Arg653Cys)                         |
| 9018 |   | 45 | N | 2 | +/- |   | c.2966T>C (p.Val989Ala)                         |  | c.3210_3211dup (p.Ser1071fs)                    |
| 3257 |   |    |   | 2 | +/- |   | c.2588G>C (p.Gly863Ala)                         |  | c.3335C>A (p.Thr1112Asn)                        |
| 3600 |   | 8  | N | 2 | +/- |   | c.3322C>T (p.Arg1108Cys)                        |  | c.4577C>T (p.Thr1526Met)                        |
| 3188 |   |    |   | 2 | +/- |   | c.2919-2A>G (p.?)                               |  | c.6718A>G (p.Thr2240Ala)                        |
| 3049 | x |    |   | 2 | +/- |   | c.2588G>C (p.Gly863Ala)                         |  | c.2947A>G (p.Thr983Ala)                         |
| 3074 | x | 36 | Y | 2 | +/- |   | c.5461-10T>C (p.?)                              |  | c.1843G>T (p.Val615Phe)                         |
| 3349 |   |    |   | 2 | +/- |   | c.5461-10T>C (p.?)                              |  | c.122G>A (p.Trp41*)                             |
| 3509 | x |    |   | 2 | +/- |   | c.2588G>C (p.Gly863Ala)                         |  | c.[3758C>T;5882G>A] (p.[Thr1253Met;Gly1961Glu]) |
| 3477 | x |    |   | 2 | +/- |   | c.2588G>C (p.Gly863Ala)                         |  | c.[4222T>C;4918C>T] (p.[Trp1408Arg;Arg1640Trp]) |
| 3348 | x |    |   | 2 | -/- | x | c.[3758C>T;5882G>A] (p.[Thr1253Met;Gly1961Glu]) |  | c.1938-619A>G (p.?)                             |
| 3449 | x |    |   | 2 | -/- |   | c.571-1G>T (p.?)                                |  | c.2160+1G>C (p.?)                               |
| 5225 | x |    |   | 2 | -/- |   | c.161G>A (p.Cys54Tyr)                           |  | c.2160+1G>C (p.?)                               |
| 3193 |   |    |   | 2 | -/- |   | c.3322C>T (p.Arg1108Cys)                        |  | c.3522+5del (p.?)                               |
| 3061 |   |    |   | 2 | -/- |   | c.3113C>T (p.Ala1038Val)                        |  | c.3813+1G>T (p.?)                               |
| 3326 |   |    | N | 2 | -/- |   | c.2971G>C (p.Gly991Arg)                         |  | c.4253+4C>T (p.?)                               |
| 3241 |   |    |   | 2 | -/- |   | c.2588G>C (p.Gly863Ala)                         |  | c.4253+5G>T (p.?)                               |
| 4542 | x |    |   | 2 | -/- | x | c.2966T>C (p.Val989Ala)                         |  | c.4253+5G>T (p.?)                               |
| 3031 |   |    |   | 2 | -/- |   | c.3386G>A (p.Arg1129His)                        |  | c.4352+1G>A (p.?)                               |
| 3525 | x |    |   | 2 | -/- | x | c.768G>T (p.?)                                  |  | c.4539+2001G>A (p.?)                            |
| 3134 |   | 5  | N | 2 | -/- | x | c.2564G>A (p.Trp855*)                           |  | c.4539+2001G>A (p.?)                            |
| 3786 |   | 14 | N | 2 | -/- | x | c.1022A>G (p.Glu341Gly)                         |  | c.4539+2028C>T (p.?)                            |
| 3513 | x |    |   | 2 | -/- | x | c.161G>A (p.Cys54Tyr)                           |  | c.4539+2028C>T (p.?)                            |
| 3291 |   |    |   | 2 | -/- | x | c.4577C>T (p.Thr1526Met)                        |  | c.4539+2028C>T (p.?)                            |
| 3798 |   | 6  | N | 2 | -/- | x | c.5113C>T (p.Arg1705Trp)                        |  | c.4539+2028C>T (p.?)                            |
| 3142 | x |    |   | 2 | -/- |   | c.[1622T>C;3113C>T] (p.[Leu541Pro;Ala1038Val])  |  | c.4540-2A>G (p.?)                               |
| 3221 | x |    |   | 2 | -/- |   | c.4328G>A (p.Arg1443His)                        |  | c.4667+1G>A (p.?)                               |
| 9004 |   |    |   | 2 | -/- | x | c.161G>A (p.Cys54Tyr)                           |  | c.4773+3A>G (p.?)                               |
| 3399 | x |    |   | 2 | -/- |   | c.5018+2T>C (p.?)                               |  | c.5018+2T>C (p.?)                               |
| 3642 |   | 19 | N | 2 | -/- |   | c.1726G>C (p.Asp576His)                         |  | c.5196+1056A>G (p.?)                            |
| 3556 |   |    |   | 2 | -/- |   | c.3413T>A (p.Leu1138His)                        |  | c.5196+1056A>G (p.?)                            |
| 4271 | x |    |   | 2 | -/- | x | c.5882G>A (p.Gly1961Glu)                        |  | c.5196+1056A>G (p.?)                            |
| 3330 |   |    |   | 2 | -/- | x | c.5882G>A (p.Gly1961Glu)                        |  | c.5196+1056A>G (p.?)                            |
| 3430 | x |    |   | 2 | -/- | x | c.161G>A (p.Cys54Tyr)                           |  | c.5196+1137G>A (p.?)                            |
| 3827 | x |    |   | 2 | -/- | x | c.161G>A (p.Cys54Tyr)                           |  | c.5196+1137G>A (p.?)                            |
| 3151 |   |    |   | 2 | -/- | x | c.666_678del (p.Lys223_Arg226delfs)             |  | c.5196+1137G>A (p.?)                            |

|      |   |    |   |   |     |   |                                                |                                                 |
|------|---|----|---|---|-----|---|------------------------------------------------|-------------------------------------------------|
| 3788 | x | 32 | Y | 2 | -/- | x | c.666_678del (p.Lys223_Arg226delfs)            | c.5196+1137G>A (p.?)                            |
| 3097 |   |    |   | 2 | -/- |   | c.571-2_c.575del (p.?)                         | c.5313-2_c.5316del (p.?)                        |
| 3143 |   |    |   | 2 | -/- |   | c.[1622T>C;3113C>T] (p.[Leu541Pro;Ala1038Val]) | c.5460+1G>A (p.?)                               |
| 3295 |   |    |   | 2 | -/- | x | c.2971G>C (p.Gly991Arg)                        | c.570+1798A>G (p.?)                             |
| Y417 |   |    |   | 2 | -/- | x | c.52C>T (p.Arg18Trp)                           | c.570+1798A>G (p.?)                             |
| 3954 | x |    |   | 2 | -/- | x | c.571-1G>T (p.?)                               | c.571-1G>T (p.?)                                |
| 3192 |   |    |   | 2 | -/- |   | c.3522+5del (p.?)                              | c.5714+5G>A (p.?)                               |
| 9025 |   | 42 | Y | 2 | -/- | x | c.5714+5G>A (p.?)                              | c.5714+5G>A (p.?)                               |
| 3353 | x |    |   | 2 | -/- |   | c.[1622T>C;3113C>T] (p.[Leu541Pro;Ala1038Val]) | c.5714+5G>A (p.?)                               |
| 3730 |   | 13 | N | 2 | -/- |   | c.[1622T>C;3113C>T] (p.[Leu541Pro;Ala1038Val]) | c.5714+5G>A (p.?)                               |
| 3225 |   |    |   | 2 | -/- |   | c.1622T>C (p.Leu541Pro)                        | c.5714+5G>A (p.?)                               |
| 3570 |   | 24 | N | 2 | -/- |   | c.1648G>A (p.Gly550Arg)                        | c.5714+5G>A (p.?)                               |
| 3226 |   |    |   | 2 | -/- | x | c.2092T>C (p.Cys698Arg)                        | c.5714+5G>A (p.?)                               |
| 3725 |   |    |   | 2 | -/- |   | c.2915C>A (p.Thr972Asn)                        | c.5714+5G>A (p.?)                               |
| 9001 | x | 17 | Y | 2 | -/- | x | c.3352C>T (p.His1118Tyr)                       | c.5714+5G>A (p.?)                               |
| 3709 | x | 19 | N | 2 | -/- |   | c.4139C>T (p.Pro1380Leu)                       | c.5714+5G>A (p.?)                               |
| 3859 | x | 8  | N | 2 | -/- |   | c.4139C>T (p.Pro1380Leu)                       | c.5714+5G>A (p.?)                               |
| 3888 | x |    |   | 2 | -/- |   | c.4139C>T (p.Pro1380Leu)                       | c.5714+5G>A (p.?)                               |
| 3071 |   |    |   | 2 | -/- |   | c.4139C>T (p.Pro1380Leu)                       | c.5714+5G>A (p.?)                               |
| 3387 |   | 43 | Y | 2 | -/- |   | c.4139C>T (p.Pro1380Leu)                       | c.5714+5G>A (p.?)                               |
| 3059 | x |    |   | 2 | -/- |   | c.106del (p.Leu37fs)                           | c.5714+5G>A (p.?)                               |
| 3378 |   |    |   | 2 | -/- | x | c.[1622T>C;3113C>T] (p.[Leu541Pro;Ala1038Val]) | c.5836-3C>A (p.?)                               |
| 3391 | x |    |   | 2 | -/- |   | c.5882G>A (p.Gly1961Glu)                       | c.6005+1G>T (p.?)                               |
| 3124 |   | 42 | Y | 2 | -/- | x | c.3814-2A>G (p.?)                              | c.6006-609T>A (p.?)                             |
| 3023 | x |    |   | 2 | -/- | x | c.5312+2T>G (p.?)                              | c.6006-609T>A (p.?)                             |
| 9029 |   | 34 | Y | 2 | -/- | x | c.[1622T>C;3113C>T] (p.[Leu541Pro;Ala1038Val]) | c.6006-609T>A (p.?)                             |
| 3782 | x |    |   | 2 | -/- | x | c.161G>A (p.Cys54Tyr)                          | c.6006-609T>A (p.?)                             |
| 3001 |   |    |   | 2 | -/- | x | c.1988G>A (p.Trp663*)                          | c.6006-609T>A (p.?)                             |
| 3638 | x |    |   | 2 | -/- |   | c.5882G>A (p.Gly1961Glu)                       | c.6148-698_c.6670del (p.?)                      |
| 3971 | x |    |   | 2 | -/- | x | c.4577C>T (p.Thr1526Met)                       | c.6386+2C>G (p.?)                               |
| 3398 |   |    |   | 2 | -/- |   | c.5882G>A (p.Gly1961Glu)                       | c.6387-1G>T (p.?)                               |
| 3809 | x | 17 | N | 2 | -/- |   | c.5882G>A (p.Gly1961Glu)                       | c.6479+1G>A (p.?)                               |
| Y416 |   |    |   | 2 | -/- |   | c.71G>A (p.Arg24His)                           | c.6479+1G>C (p.?)                               |
| 3925 |   | 31 |   | 2 | -/- | x | c.5882G>A (p.Gly1961Glu)                       | c.67-1845_c.160+345del (p.?)                    |
| 3539 | x |    |   | 2 | -/- |   | c.5882G>A (p.Gly1961Glu)                       | c.6729+5_6729+19del (p.?)                       |
| 3928 |   |    |   | 2 | -/- |   | c.5882G>A (p.Gly1961Glu)                       | c.6729+5_6729+19del (p.?)                       |
| 3572 |   |    |   | 2 | -/- |   | c.859-9T>C (p.?)                               | c.859-9T>C (p.?)                                |
| 3106 | x |    |   | 2 | -/- |   | c.859-9T>C (p.?)                               | c.859-9T>C (p.?)                                |
| 3392 |   |    |   | 2 | -/- |   | c.5318C>T (p.Ala1773Val)                       | c.4773G>C (p.?)                                 |
| 3035 |   |    |   | 2 | -/- | x | c.5882G>A (p.Gly1961Glu)                       | c.6342G>A (p.?)                                 |
| 3516 |   |    |   | 2 | -/- |   | c.2894A>G (p.Asn965Ser)                        | c.[3416A>G;6119G>A] (p.[Tyr1139Cys;Arg2040Gln]) |

|      |   |    |   |   |     |   |                                                 |                                                       |
|------|---|----|---|---|-----|---|-------------------------------------------------|-------------------------------------------------------|
| 3263 |   |    |   | 2 | -/- |   | c.194G>A (p.Gly65Glu)                           | c.3113C>T (p.Ala1038Val)                              |
| 3384 | x |    |   | 2 | -/- |   | c.1988G>A (p.Trp663*)                           | c.3113C>T (p.Ala1038Val)                              |
| 9084 | x |    |   | 2 | -/- |   | c.247_250dup (p.Ser84fs)                        | c.3113C>T (p.Ala1038Val)                              |
| 3511 | x |    |   | 2 | -/- |   | c.4457C>T (p.Pro1486Leu)                        | c.4793C>A (p.Ala1598Asp)                              |
| 3198 | x |    |   | 2 | -/- |   | c.4793C>A (p.Ala1598Asp)                        | c.4793C>A (p.Ala1598Asp)                              |
| 3385 | x |    |   | 2 | -/- |   | c.4793C>A (p.Ala1598Asp)                        | c.4793C>A (p.Ala1598Asp)                              |
| 4515 | x | 12 | N | 2 | -/- |   | c.3386G>T (p.Arg1129Leu)                        | c.5318C>T (p.Ala1773Val)                              |
| 3785 |   | 11 | N | 2 | -/- |   | c.5380G>C (p.Ala1794Pro)                        | c.5380G>C (p.Ala1794Pro)                              |
| 3052 |   |    |   | 2 | -/- | x | c.3287C>T (p.Ser1096Leu)                        | c.6108_6130dup (p.Ala2044ValinsProGlyPheGluValTyrGln) |
| 3483 |   | 10 | N | 2 | -/- |   | c.2453G>A (p.Gly818Glu)                         | c.4462T>C (p.Cys1488Arg)                              |
| 3818 | x |    |   | 2 | -/- |   | c.5882G>A (p.Gly1961Glu)                        | c.6448T>C (p.Cys2150Arg)                              |
| 3416 | x |    |   | 2 | -/- |   | c.[2560G>A;3113C>T] (p.[Ala854Thr;Ala1038Val])  | c.6449G>A (p.Cys2150Tyr)                              |
| 3498 | x |    |   | 2 | -/- |   | c.2461T>A (p.Trp821Arg)                         | c.6449G>A (p.Cys2150Tyr)                              |
| 3561 |   |    |   | 2 | -/- |   | c.5882G>A (p.Gly1961Glu)                        | c.6449G>A (p.Cys2150Tyr)                              |
| 4185 |   | 12 | N | 2 | -/- |   | c.5714+5G>A (p.?)                               | c.161G>A (p.Cys54Tyr)                                 |
| 3231 |   |    |   | 2 | -/- |   | c.247_250dup (p.Ser84fs)                        | c.323A>T (p.Asp108Val)                                |
| 3075 |   |    |   | 2 | -/- |   | c.52C>T (p.Arg18Trp)                            | c.3606T>A (p.Asp1202Glu)                              |
| 3748 | x | 3  | N | 2 | -/- |   | c.834del (p.Asp279fs)                           | c.834delT (p.Asp279fs)                                |
| 3732 |   | 32 | Y | 2 | -/- |   | c.[1622T>C;3113C>T] (p.[Leu541Pro;Ala1038Val])  | c.1726G>C (p.Asp576His)                               |
|      |   |    |   |   |     |   | c.[1622T>C;1933G>A;3113C>T]                     |                                                       |
| 3423 |   | 12 | N | 2 | -/- |   | (p.[Leu541Pro;Asp645Asn;Ala1038Val])            | c.1933G>A (p.Asp645Asn)                               |
| 3821 | x |    |   | 2 | -/- |   | c.[1622T>C;3113C>T] (p.[Leu541Pro;Ala1038Val])  | c.3259G>A (p.Glu1087Lys)                              |
| 3960 | x | 17 | N | 2 | -/- | x | c.2401G>A (p.Ala801Thr)                         | c.3259G>A (p.Glu1087Lys)                              |
| 9064 | x |    |   | 2 | -/- |   | c.3988G>T (p.Glu1330*)                          | c.3988G>T (p.Glu1330*)                                |
| 3113 |   |    |   | 2 | -/- |   | c.4854G>T (p.Trp1618Cys)                        | c.6694G>A (p.Glu2232Lys)                              |
| 4333 | x |    |   | 2 | -/- |   | c.1222C>T (p.Arg408*)                           | c.4249_4251del (p.Phe1417del)                         |
| 3211 |   |    |   | 2 | -/- |   | c.3323G>A (p.Arg1108His)                        | c.4318T>G (p.Phe1440Val)                              |
| 3478 |   |    |   | 2 | -/- |   | c.71G>A (p.Arg24His)                            | c.751_753del (p.Phe251del)                            |
| 3220 | x |    |   | 2 | -/- |   | c.101_106del (p.Ser34_Leu35delfs)               | c.3547G>T (p.Gly1183Cys)                              |
| 3578 | x |    |   | 2 | -/- |   | c.3113C>T (p.Ala1038Val)                        | c.4322G>A (p.Gly1441Asp)                              |
| 3494 | x |    |   | 2 | -/- |   | c.[1622T>C;4328G>A] (p.[Leu541Pro;Arg1443His])  | c.5882G>A (p.Gly1961Glu)                              |
| 3262 | x | 32 | Y | 2 | -/- |   | c.[3758C>T;5882G>A] (p.[Thr1253Met;Gly1961Glu]) | c.5882G>A (p.Gly1961Glu)                              |
| 3586 | x |    |   | 2 | -/- |   | c.[1A>G;6089G>A] (p.[?;Arg2030Gln])             | c.5882G>A (p.Gly1961Glu)                              |
| 3401 | x |    |   | 2 | -/- |   | c.[3608G>A;4537del] (p.[Gly1203Glu;Gln1513fs])  | c.5882G>A (p.Gly1961Glu)                              |
| 3501 | x |    |   | 2 | -/- |   | c.1100-1G>A (p.?)                               | c.5882G>A (p.Gly1961Glu)                              |
| 3418 |   | 19 | N | 2 | -/- |   | c.160+2T>C (p.?)                                | c.5882G>A (p.Gly1961Glu)                              |
| 3267 |   |    |   | 2 | -/- |   | c.160+5G>C (p.?)                                | c.5882G>A (p.Gly1961Glu)                              |
| 3039 |   |    |   | 2 | -/- |   | c.2382+1G>A (p.?)                               | c.5882G>A (p.Gly1961Glu)                              |
| 3343 | x |    |   | 2 | -/- |   | c.3050+5G>A (p.?)                               | c.5882G>A (p.Gly1961Glu)                              |
| 3594 | x |    |   | 2 | -/- |   | c.3050+5G>A (p.?)                               | c.5882G>A (p.Gly1961Glu)                              |
| 3708 |   | 13 |   | 2 | -/- |   | c.3050+5G>A (p.?)                               | c.5882G>A (p.Gly1961Glu)                              |

|      |   |    |   |   |     |   |                                                |                          |
|------|---|----|---|---|-----|---|------------------------------------------------|--------------------------|
| 4385 |   |    |   | 2 | -/- |   | c.3050+5G>A (p.?)                              | c.5882G>A (p.Gly1961Glu) |
| 3309 |   |    |   | 2 | -/- |   | c.4539+1G>T (p.?)                              | c.5882G>A (p.Gly1961Glu) |
| 3533 |   |    |   | 2 | -/- |   | c.4540-2A>G (p.?)                              | c.5882G>A (p.Gly1961Glu) |
| 3453 |   |    |   | 2 | -/- |   | c.5018+2T>C (p.?)                              | c.5882G>A (p.Gly1961Glu) |
| 3260 | x |    |   | 2 | -/- |   | c.[1622T>C;3113C>T] (p.[Leu541Pro;Ala1038Val]) | c.5882G>A (p.Gly1961Glu) |
| 3214 | x |    |   | 2 | -/- |   | c.[1622T>C;3113C>T] (p.[Leu541Pro;Ala1038Val]) | c.5882G>A (p.Gly1961Glu) |
| 4547 |   |    |   | 2 | -/- | x | c.[1622T>C;3113C>T] (p.[Leu541Pro;Ala1038Val]) | c.5882G>A (p.Gly1961Glu) |
| 3248 |   |    |   | 2 | -/- |   | c.[1622T>C;3113C>T] (p.[Leu541Pro;Ala1038Val]) | c.5882G>A (p.Gly1961Glu) |
| 3324 |   |    |   | 2 | -/- |   | c.[1622T>C;3113C>T] (p.[Leu541Pro;Ala1038Val]) | c.5882G>A (p.Gly1961Glu) |
| 3964 |   | 11 |   | 2 | -/- | x | c.[1622T>C;3113C>T] (p.[Leu541Pro;Ala1038Val]) | c.5882G>A (p.Gly1961Glu) |
| 3167 |   | 10 | Y | 2 | -/- |   | c.[1622T>C;3113C>T] (p.[Leu541Pro;Ala1038Val]) | c.5882G>A (p.Gly1961Glu) |
| 3249 |   |    |   | 2 | -/- |   | c.[1622T>C;3113C>T] (p.[Leu541Pro;Ala1038Val]) | c.5882G>A (p.Gly1961Glu) |
| 3322 |   |    |   | 2 | -/- |   | c.[1622T>C;3113C>T] (p.[Leu541Pro;Ala1038Val]) | c.5882G>A (p.Gly1961Glu) |
| 3373 |   |    |   | 2 | -/- |   | c.[1622T>C;3113C>T] (p.[Leu541Pro;Ala1038Val]) | c.5882G>A (p.Gly1961Glu) |
| 3091 |   | 33 | Y | 2 | -/- |   | c.1208A>T (p.Asp403Val)                        | c.5882G>A (p.Gly1961Glu) |
| 3066 |   |    |   | 2 | -/- |   | c.161G>A (p.Cys54Tyr)                          | c.5882G>A (p.Gly1961Glu) |
| 3289 | x |    |   | 2 | -/- |   | c.1622T>C (p.Leu541Pro)                        | c.5882G>A (p.Gly1961Glu) |
| 3371 |   |    |   | 2 | -/- |   | c.1804C>T (p.Arg602Trp)                        | c.5882G>A (p.Gly1961Glu) |
| 3842 |   |    |   | 2 | -/- | x | c.1819G>T (p.Gly607Trp)                        | c.5882G>A (p.Gly1961Glu) |
| 3000 |   |    |   | 2 | -/- |   | c.1908G>T (p.Gln636His)                        | c.5882G>A (p.Gly1961Glu) |
| 3852 |   |    |   | 2 | -/- |   | c.1957C>T (p.Arg653Cys)                        | c.5882G>A (p.Gly1961Glu) |
| 3109 |   |    |   | 2 | -/- |   | c.1964T>G (p.Phe655Cys)                        | c.5882G>A (p.Gly1961Glu) |
| 3409 | x |    |   | 2 | -/- |   | c.1988G>A (p.Trp663*)                          | c.5882G>A (p.Gly1961Glu) |
| 3016 | x |    |   | 2 | -/- |   | c.1A>G (p.?)                                   | c.5882G>A (p.Gly1961Glu) |
| 3175 |   |    |   | 2 | -/- |   | c.2453G>T (p.Gly818Val)                        | c.5882G>A (p.Gly1961Glu) |
| 3824 | x |    |   | 2 | -/- |   | c.286A>G (p.Asn96Asp)                          | c.5882G>A (p.Gly1961Glu) |
| 3792 |   |    |   | 2 | -/- |   | c.3007C>T (p.Gln1003*)                         | c.5882G>A (p.Gly1961Glu) |
| 3130 |   | 36 | Y | 2 | -/- |   | c.3322C>T (p.Arg1108Cys)                       | c.5882G>A (p.Gly1961Glu) |
| 3208 |   |    |   | 2 | -/- |   | c.3364G>A (p.Glu1122Lys)                       | c.5882G>A (p.Gly1961Glu) |
| 3493 |   |    |   | 2 | -/- |   | c.3385C>T (p.Arg1129Cys)                       | c.5882G>A (p.Gly1961Glu) |
| 3475 |   |    |   | 2 | -/- |   | c.4070C>T (p.Ala1357Val)                       | c.5882G>A (p.Gly1961Glu) |
| 3435 | x |    |   | 2 | -/- |   | c.4139C>T (p.Pro1380Leu)                       | c.5882G>A (p.Gly1961Glu) |
| 3451 | x |    |   | 2 | -/- |   | c.4139C>T (p.Pro1380Leu)                       | c.5882G>A (p.Gly1961Glu) |
| 3543 | x |    |   | 2 | -/- |   | c.4139C>T (p.Pro1380Leu)                       | c.5882G>A (p.Gly1961Glu) |
| 3565 | x |    |   | 2 | -/- |   | c.4139C>T (p.Pro1380Leu)                       | c.5882G>A (p.Gly1961Glu) |
| 7076 |   |    |   | 2 | -/- |   | c.4139C>T (p.Pro1380Leu)                       | c.5882G>A (p.Gly1961Glu) |
| Y391 |   |    |   | 2 | -/- |   | c.4139C>T (p.Pro1380Leu)                       | c.5882G>A (p.Gly1961Glu) |
| 4361 |   |    |   | 2 | -/- |   | c.4139C>T (p.Pro1380Leu)                       | c.5882G>A (p.Gly1961Glu) |
| Y395 |   |    |   | 2 | -/- |   | c.4217A>G (p.His1406Arg)                       | c.5882G>A (p.Gly1961Glu) |
| 3233 |   |    |   | 2 | -/- |   | c.4234C>T (p.Gln1412*)                         | c.5882G>A (p.Gly1961Glu) |
| 3382 |   |    |   | 2 | -/- |   | c.4234C>T (p.Gln1412*)                         | c.5882G>A (p.Gly1961Glu) |

|      |   |    |   |   |     |   |                                                |                                         |
|------|---|----|---|---|-----|---|------------------------------------------------|-----------------------------------------|
| 3784 |   | 27 | N | 2 | -/- |   | c.4462T>C (p.Cys1488Arg)                       | c.5882G>A (p.Gly1961Glu)                |
| 3323 |   |    |   | 2 | -/- |   | c.454C>T (p.Arg152*)                           | c.5882G>A (p.Gly1961Glu)                |
| 3254 | x |    |   | 2 | -/- |   | c.45G>A (p.Trp15*)                             | c.5882G>A (p.Gly1961Glu)                |
| 3067 |   |    |   | 2 | -/- |   | c.5087G>A (p.Ser1696Asn)                       | c.5882G>A (p.Gly1961Glu)                |
| 3196 |   |    |   | 2 | -/- |   | c.5114G>T (p.Arg1705Leu)                       | c.5882G>A (p.Gly1961Glu)                |
| 3062 |   |    |   | 2 | -/- |   | c.5316G>A (p.Trp1772*)                         | c.5882G>A (p.Gly1961Glu)                |
| 3469 |   |    |   | 2 | -/- | x | c.5318C>T (p.Ala1773Val)                       | c.5882G>A (p.Gly1961Glu)                |
| 6046 | x |    |   | 2 | -/- |   | c.5882G>A (p.Gly1961Glu)                       | c.5882G>A (p.Gly1961Glu)                |
| 3329 | x |    |   | 2 | -/- |   | c.5882G>A (p.Gly1961Glu)                       | c.5882G>A (p.Gly1961Glu)                |
| 3190 |   |    |   | 2 | -/- |   | c.5882G>A (p.Gly1961Glu)                       | c.5882G>A (p.Gly1961Glu)                |
| 3235 |   |    |   | 2 | -/- |   | c.5882G>A (p.Gly1961Glu)                       | c.5882G>A (p.Gly1961Glu)                |
| 4085 | x |    |   | 2 | -/- |   | c.634C>T (p.Arg212Cys)                         | c.5882G>A (p.Gly1961Glu)                |
| 3432 | x |    |   | 2 | -/- |   | c.634C>T (p.Arg212Cys)                         | c.5882G>A (p.Gly1961Glu)                |
| 3222 |   |    |   | 2 | -/- |   | c.564del (p.Glu189fs)                          | c.5882G>A (p.Gly1961Glu)                |
| 3804 |   |    |   | 2 | -/- |   | c.2191_2199del (p.Phe731_Leu733del)            | c.5882G>A (p.Gly1961Glu)                |
| 3266 |   |    |   | 2 | -/- |   | c.4734del (p.Leu1580*)                         | c.5882G>A (p.Gly1961Glu)                |
| 3275 |   | 13 | Y | 2 | -/- |   | c.4537dup (p.Gln1513fs)                        | c.5882G>A (p.Gly1961Glu)                |
| 9028 |   | 16 | Y | 2 | -/- |   | c.5196+1G>A (p.?)                              | c.5882G>A (p.Gly1961Glu)                |
| 4602 | x |    |   | 2 | -/- |   | c.[1622T>C;3113C>T] (p.[Leu541Pro;Ala1038Val]) | c.5882G>A (p.Gly1961Glu)                |
| 9090 | x |    |   | 2 | -/- |   | c.[1622T>C;3113C>T] (p.[Leu541Pro;Ala1038Val]) | c.5882G>A (p.Gly1961Glu)                |
| 9056 |   |    |   | 2 | -/- |   | c.3407G>T (p.Gly1136Val)                       | c.5882G>A (p.Gly1961Glu)                |
| 3993 |   |    |   | 2 | -/- |   | c.5882G>A (p.Gly1961Glu)                       | c.5882G>A (p.Gly1961Glu)                |
| 3998 |   | 49 | Y | 2 | -/- |   | c.5882G>A (p.Gly1961Glu)                       | c.5882G>A (p.Gly1961Glu)                |
| 9068 | x |    |   | 2 | -/- |   | c.4947del (p.Glu1650fs)                        | c.5882G>A (p.Gly1961Glu)                |
| 3480 |   |    |   | 2 | -/- |   | c.2947A>G (p.Thr983Ala)                        | c.5882G>A (p.Gly1961Glu)                |
| 3174 |   |    |   | 2 | -/- |   | c.286A>G (p.Asn96Asp)                          | c.[5959G>T;c.5961_5964del] (p.Gly1987*) |
| 9019 |   |    |   | 2 | -/- |   | c.2588G>C (p.Gly863Ala)                        | c.2897G>A (p.Gly966Glu)                 |
| 3044 |   |    |   | 2 | -/- |   | c.2971G>C (p.Gly991Arg)                        | c.4875T>A (p.His1625Gln)                |
| 3904 |   | 20 | Y | 2 | -/- |   | c.[1622T>C;3113C>T] (p.[Leu541Pro;Ala1038Val]) | c.5051T>A (p.Ile1684Asn)                |
| 4060 | x |    |   | 2 | -/- |   | c.[1622T>C;3113C>T] (p.[Leu541Pro;Ala1038Val]) | c.3543del (p.Lys1182fs)                 |
| 3688 |   | 42 | Y | 2 | -/- |   | c.2925C>G (p.Ile975Met)                        | c.5932A>G (p.Lys1978Glu)                |
| 3137 |   | 36 | Y | 2 | -/- | x | c.2971G>C (p.Gly991Arg)                        | c.3377T>C (p.Leu1126Pro)                |
| 3470 | x |    |   | 2 | -/- | x | c.2971G>C (p.Gly991Arg)                        | c.3413T>C (p.Leu1138Pro)                |
| 3015 |   |    |   | 2 | -/- |   | c.3279C>A (p.Asp1093Glu)                       | c.3819dup (p.Leu1274fs)                 |
| 3956 |   | 14 | Y | 2 | -/- | x | c.2813T>C (p.Phe938Ser)                        | c.5186T>C (p.Leu1729Pro)                |
| 3502 |   |    |   | 2 | -/- |   | c.2947A>G (p.Thr983Ala)                        | c.5186T>C (p.Leu1729Pro)                |
| 3968 |   |    |   | 2 | -/- |   | c.5059del (p.Ile1687fs)                        | c.5351T>G (p.Leu1784Arg)                |
| 3173 |   |    |   | 2 | -/- |   | c.4139C>T (p.Pro1380Leu)                       | c.5819T>A (p.Leu1940Gln)                |
| 9012 |   | 22 | Y | 2 | -/- | x | c.[71G>A;5882G>A] (p.[Arg24His;Gly1961Glu])    | c.6079C>T (p.Leu2027Phe)                |
| 3313 |   |    |   | 2 | -/- |   | c.4253+5G>T (p.?)                              | c.6079C>T (p.Leu2027Phe)                |
| 3010 | x |    |   | 2 | -/- |   | c.[1622T>C;3113C>T] (p.[Leu541Pro;Ala1038Val]) | c.6079C>T (p.Leu2027Phe)                |

|      |   |    |   |   |     |  |   |                                                 |                                       |
|------|---|----|---|---|-----|--|---|-------------------------------------------------|---------------------------------------|
| 3778 | x |    |   | 2 | -/- |  |   | c.[1622T>C;3113C>T] (p.[Leu541Pro;Ala1038Val])  | c.6079C>T (p.Leu2027Phe)              |
| 3466 |   |    |   | 2 | -/- |  |   | c.[1622T>C;3113C>T] (p.[Leu541Pro;Ala1038Val])  | c.6079C>T (p.Leu2027Phe)              |
| 3604 | x |    |   | 2 | -/- |  |   | c.2915C>A (p.Thr972Asn)                         | c.6079C>T (p.Leu2027Phe)              |
| 3252 | x |    |   | 2 | -/- |  |   | c.3323G>A (p.Arg1108His)                        | c.6079C>T (p.Leu2027Phe)              |
| 3209 |   |    |   | 2 | -/- |  |   | c.4139C>T (p.Pro1380Leu)                        | c.6079C>T (p.Leu2027Phe)              |
| 3765 |   |    |   | 2 | -/- |  |   | c.4457C>T (p.Pro1486Leu)                        | c.6079C>T (p.Leu2027Phe)              |
| 3011 |   |    |   | 2 | -/- |  |   | c.4577C>T (p.Thr1526Met)                        | c.6079C>T (p.Leu2027Phe)              |
| 3962 |   | 44 | Y | 2 | -/- |  | x | c.5882G>A (p.Gly1961Glu)                        | c.6079C>T (p.Leu2027Phe)              |
| 3242 |   |    |   | 2 | -/- |  |   | c.91T>C (p.Trp31Arg)                            | c.6079C>T (p.Leu2027Phe)              |
| 3817 |   | 12 | Y | 2 | -/- |  |   | c.5882G>A (p.Gly1961Glu)                        | c.6098T>A (p.Leu2033His)              |
| 3160 |   |    |   | 2 | -/- |  |   | c.3292C>T (p.Arg1098Cys)                        | c.6179T>G (p.Leu2060Arg)              |
| 3403 | x |    |   | 2 | -/- |  |   | c.4437G>A (p.Trp1479* )                         | c.6419T>A (p.Leu2140Gln)              |
| 3164 |   | 47 | Y | 2 | -/- |  |   | c.6543_6578del (p.Leu2182_Phe2193del )          | c.6543_6578del (p.Leu2182_Phe2193del) |
| 3395 |   |    |   | 2 | -/- |  | x | c.859-9T>C (p.?)                                | c.885del (p.Leu296fs)                 |
| 3178 |   |    |   | 2 | -/- |  |   | c.1622T>C (p.Leu541Pro)                         | c.1622T>C (p.Leu541Pro)               |
| 3412 |   |    |   | 2 | -/- |  |   | c.1804C>T (p.Arg602Trp)                         | c.5646G>A (p.Met1882Ile)              |
| 3411 |   |    |   | 2 | -/- |  |   | c.2023G>A (p.Val675Ile)                         | c.5646G>A (p.Met1882Ile)              |
| 3390 |   |    |   | 2 | -/- |  |   | c.634C>T (p.Arg212Cys)                          | c.4326C>A (p.Asn1442Lys)              |
| 3686 |   | 5  | N | 2 | -/- |  |   | c.[1622T>C;3113C>T] (p.[Leu541Pro;Ala1038Val])  | c.2894A>G (p.Asn965Ser)               |
| 3811 |   | 6  | N | 2 | -/- |  |   | c.2461T>A (p.Trp821Arg)                         | c.2894A>G (p.Asn965Ser)               |
| 3364 | x |    |   | 2 | -/- |  |   | c.2894A>G (p.Asn965Ser)                         | c.2894A>G (p.Asn965Ser)               |
| 3136 |   |    |   | 2 | -/- |  | x | c.2041C>T (p.Arg681*)                           | c.294C>G (p.Asn98Lys)                 |
| 3942 |   | 13 | N | 2 | -/- |  | x | c.[3758C>T;5882G>A] (p.[Thr1253Met;Gly1961Glu]) | c.4139C>T (p.Pro1380Leu)              |
| 3887 |   |    |   | 2 | -/- |  |   | c.[3758C>T;5882G>A] (p.[Thr1253Met;Gly1961Glu]) | c.4139C>T (p.Pro1380Leu)              |
| 3413 |   |    |   | 2 | -/- |  |   | c.[3758C>T;5882G>A] (p.[Thr1253Met;Gly1961Glu]) | c.4139C>T (p.Pro1380Leu)              |
| 3236 |   |    |   | 2 | -/- |  |   | c.[1A>G;6089G>A] (p.[?;Arg2030Gln])             | c.4139C>T (p.Pro1380Leu)              |
| 5180 | x | 6  | N | 2 | -/- |  |   | c.3050+5G>A (p.?)                               | c.4139C>T (p.Pro1380Leu)              |
| 3419 |   |    |   | 2 | -/- |  | x | c.859-9T>C (p.?)                                | c.4139C>T (p.Pro1380Leu)              |
| 3548 |   |    |   | 2 | -/- |  |   | c.3322C>T (p.Arg1108Cys)                        | c.4139C>T (p.Pro1380Leu)              |
| 3243 |   |    |   | 2 | -/- |  |   | c.3322C>T (p.Arg1108Cys)                        | c.4139C>T (p.Pro1380Leu)              |
| 3801 |   |    |   | 2 | -/- |  |   | c.3322C>T (p.Arg1108Cys)                        | c.4139C>T (p.Pro1380Leu)              |
| 3858 |   |    |   | 2 | -/- |  |   | c.3322C>T (p.Arg1108Cys)                        | c.4139C>T (p.Pro1380Leu)              |
| 3126 | x |    |   | 2 | -/- |  |   | c.3323G>A (p.Arg1108His)                        | c.4139C>T (p.Pro1380Leu)              |
| Y423 |   |    |   | 2 | -/- |  |   | c.3323G>A (p.Arg1108His)                        | c.4139C>T (p.Pro1380Leu)              |
| 4428 |   | 10 | N | 2 | -/- |  |   | c.3911T>A (p.Leu1304*)                          | c.4139C>T (p.Pro1380Leu)              |
| 3072 | x |    |   | 2 | -/- |  |   | c.4139C>T (p.Pro1380Leu)                        | c.4139C>T (p.Pro1380Leu)              |
| 3402 |   |    |   | 2 | -/- |  |   | c.4139C>T (p.Pro1380Leu)                        | c.4139C>T (p.Pro1380Leu)              |
| Y485 |   |    |   | 2 | -/- |  |   | c.4139C>T (p.Pro1380Leu)                        | c.4139C>T (p.Pro1380Leu)              |
| 3486 |   |    |   | 2 | -/- |  |   | c.4139C>T (p.Pro1380Leu)                        | c.4139C>T (p.Pro1380Leu)              |
| 3953 |   |    |   | 2 | -/- |  | x | c.4139C>T (p.Pro1380Leu)                        | c.4139C>T (p.Pro1380Leu)              |
| 3006 |   |    |   | 2 | -/- |  |   | c.5882G>A (p.Gly1961Glu)                        | c.4139C>T (p.Pro1380Leu)              |



|      |   |    |   |   |     |   |                                                |                          |
|------|---|----|---|---|-----|---|------------------------------------------------|--------------------------|
| 3624 |   | 5  | N | 2 | -/- |   | c.768G>T (p.?)                                 | c.4139C>T (p.Pro1380Leu) |
| 3926 | x | 11 | N | 2 | -/- |   | c.1025_1038del (p.Asp342_Lys346delfs)          | c.4139C>T (p.Pro1380Leu) |
| 3279 | x | 31 | Y | 2 | -/- |   | c.2893A>T (p.Asn965Tyr)                        | c.4457C>T (p.Pro1486Leu) |
| 3805 |   |    |   | 2 | -/- |   | c.3470T>G (p.Leu1157*)                         | c.3876G>C (p.Gln1292His) |
| 3154 |   |    |   | 2 | -/- |   | c.[1622T>C;3113C>T] (p.[Leu541Pro;Ala1038Val]) | c.4234C>T (p.Gln1412*)   |
| 4286 | x |    |   | 2 | -/- |   | c.3322C>T (p.Arg1108Cys)                       | c.4234C>T (p.Gln1412*)   |
| 3656 | x |    |   | 2 | -/- |   | c.66G>A (p.?)                                  | c.6658C>T (p.Gln2220*)   |
| 3128 |   | 32 | Y | 2 | -/- |   | c.[2627A>C;3322C>T] (p.[Gln876Pro;Arg1108Cys]) | c.2627A>C (p.Gln876Pro)  |
| 9015 |   |    |   | 2 | -/- |   | c.1819G>A (p.Gly607Arg)                        | c.3292C>T (p.Arg1098Cys) |
| 3771 |   | 8  | N | 2 | -/- |   | c.2617T>C (p.Phe873Leu)                        | c.3292C>T (p.Arg1098Cys) |
| 9060 |   | 22 | N | 2 | -/- |   | c.3322C>T (p.Arg1108Cys)                       | c.3322C>T (p.Arg1108Cys) |
| 3121 |   |    |   | 2 | -/- |   | c.2947A>G (p.Thr983Ala)                        | c.3322C>T (p.Arg1108Cys) |
| 3969 | x |    |   | 2 | -/- | x | c.3287C>T (p.Ser1096Leu)                       | c.3322C>T (p.Arg1108Cys) |
| 3873 | x |    |   | 2 | -/- |   | c.478G>T (p.Glu160*)                           | c.3322C>T (p.Arg1108Cys) |
| 3234 |   |    |   | 2 | -/- |   | c.634C>T (p.Arg212Cys)                         | c.3323G>T (p.Arg1108Leu) |
| 3102 |   |    |   | 2 | -/- |   | c.[1622T>C;3113C>T] (p.[Leu541Pro;Ala1038Val]) | c.3385C>T (p.Arg1129Cys) |
| 3288 |   |    |   | 2 | -/- |   | c.2894A>G (p.Asn965Ser)                        | c.3386G>T (p.Arg1129Leu) |
| 3899 | x | 9  | N | 2 | -/- |   | c.1025_1038del (p.Asp342_Lys346delfs)          | c.3386G>T (p.Arg1129Leu) |
| 3912 | x |    |   | 2 | -/- |   | c.2813T>C (p.Phe938Ser)                        | c.3898C>T (p.Arg1300*)   |
| 3060 | x |    |   | 2 | -/- |   | c.1804C>T (p.Arg602Trp)                        | c.3898C>T (p.Arg1300*)   |
| 3447 |   |    |   | 2 | -/- |   | c.4667G>A (p.Arg1556Lys)                       | c.4667G>A (p.Arg1556Lys) |
| 3081 |   |    |   | 2 | -/- |   | c.3056C>T (p.Thr1019Met)                       | c.4919G>A (p.Arg1640Gln) |
| 3036 | x |    |   | 2 | -/- |   | c.3322C>T (p.Arg1108Cys)                       | c.4919G>A (p.Arg1640Gln) |
| 3365 |   |    |   | 2 | -/- |   | c.4139C>T (p.Pro1380Leu)                       | c.4919G>A (p.Arg1640Gln) |
| 3187 |   |    |   | 2 | -/- |   | c.5196+1G>A (p.?)                              | c.6089G>A (p.Arg2030Gln) |
| 3183 |   | 33 | Y | 2 | -/- |   | c.1648G>A (p.Gly550Arg)                        | c.6089G>A (p.Arg2030Gln) |
| 3407 | x |    |   | 2 | -/- |   | c.4139C>T (p.Pro1380Leu)                       | c.6089G>A (p.Arg2030Gln) |
| 4273 | x |    |   | 2 | -/- |   | c.4639A>T (p.Lys1547*)                         | c.6089G>A (p.Arg2030Gln) |
| 4405 |   |    |   | 2 | -/- |   | c.6079C>T (p.L2027Phe)                         | c.6089G>A (p.Arg2030Gln) |
| 3529 |   | 33 | Y | 2 | -/- |   | c.716G>A (p.Trp239*)                           | c.6089G>A (p.Arg2030Gln) |
| 3870 | x |    |   | 2 | -/- |   | c.5312+1G>A (p.?)                              | c.6088C>T (p.Arg2030*)   |
| 3978 |   | 10 | N | 2 | -/- | x | c.5312+2T>G (p.?)                              | c.6088C>T (p.Arg2030*)   |
| 3650 |   |    |   | 2 | -/- |   | c.6088C>T (p.Arg2030*)                         | c.6088C>T (p.Arg2030*)   |
| 5010 |   |    |   | 2 | -/- |   | c.1374del (p.Thr459fs)                         | c.6088C>T (p.Arg2030*)   |
| 9057 | x | 11 | Y | 2 | -/- |   | c.4577C>T (p.Thr1526Met)                       | c.6119G>A (p.Arg2040Gln) |
| 3328 |   | 7  | N | 2 | -/- |   | c.1819G>A (p.Gly607Arg)                        | c.6119G>A (p.Arg2040Gln) |
| 3670 |   | 9  | N | 2 | -/- |   | c.5882G>A (p.Gly1961Glu)                       | c.6118C>T (p.Arg2040*)   |
| 3338 | x |    |   | 2 | -/- |   | c.688T>A (p.Cys230Ser )                        | c.6229C>G (p.Arg2077Gly) |
| 3723 |   | 10 | N | 2 | -/- |   | c.3385C>T (p.Arg1129Cys)                       | c.6229C>T (p.Arg2077Trp) |
| 3259 |   |    |   | 2 | -/- |   | c.5882G>A (p.Gly1961Glu)                       | c.6229C>T (p.Arg2077Trp) |
| 3583 | x |    |   | 2 | -/- |   | c.6079C>T (p.L2027Phe)                         | c.6229C>T (p.Arg2077Trp) |

|      |   |    |   |   |     |   |                                                 |                                         |
|------|---|----|---|---|-----|---|-------------------------------------------------|-----------------------------------------|
| 3990 | x | 16 | Y | 2 | -/- |   | c.4253+5G>A (p.?)                               | c.6316C>T (p.Arg2106Cys)                |
| 3258 |   |    |   | 2 | -/- |   | c.1100-6T>A (p.?)                               | c.6316C>T (p.Arg2106Cys)                |
| 3598 |   |    |   | 2 | -/- | x | c.3898C>T (p.Arg1300*)                          | c.6316C>T (p.Arg2106Cys)                |
| 3934 |   |    |   | 2 | -/- |   | c.4538A>G (p.Gln1513Arg)                        | c.6316C>T (p.Arg2106Cys)                |
| 3812 |   |    |   | 2 | -/- |   | c.3554_3555CC>GA (p.Ser1185*)                   | c.6317G>A (p.Arg2106His)                |
| Y265 |   |    |   | 2 | -/- |   | c.1805G>A (p.Arg602Gln)                         | c.6317_6323del (p.Arg2107_Met2108delfs) |
| 3986 |   |    |   | 2 | -/- |   | c.1804C>T (p.Arg602Trp)                         | c.6320G>A (p.Arg2107His)                |
| 3775 |   | 21 | N | 2 | -/- |   | c.302+1G>A (p.?)                                | c.6320G>A (p.Arg2107His)                |
| 3523 | x |    |   | 2 | -/- |   | c.3050+5G>A (p.?)                               | c.6320G>A (p.Arg2107His)                |
| 3261 |   |    |   | 2 | -/- |   | c.3523-1G>A (p.?)                               | c.6320G>A (p.Arg2107His)                |
| 3517 | x |    |   | 2 | -/- |   | c.4540-2A>G (p.?)                               | c.6320G>A (p.Arg2107His)                |
| 3299 |   |    |   | 2 | -/- |   | c.768G>T (p.?)                                  | c.6320G>A (p.Arg2107His)                |
| 3380 |   |    |   | 2 | -/- |   | c.[1622T>C;3113C>T] (p.[Leu541Pro;Ala1038Val])  | c.6320G>A (p.Arg2107His)                |
| 3559 |   |    |   | 2 | -/- |   | c.[1622T>C;3113C>T] (p.[Leu541Pro;Ala1038Val])  | c.6320G>A (p.Arg2107His)                |
| 3664 |   |    |   | 2 | -/- |   | c.1015T>G (p.Trp339Gly)                         | c.6320G>A (p.Arg2107His)                |
| 3894 | x |    |   | 2 | -/- |   | c.1577A>C (p.Glu526Ala)                         | c.6320G>A (p.Arg2107His)                |
| 3920 |   |    |   | 2 | -/- |   | c.1577A>C (p.Glu526Ala)                         | c.6320G>A (p.Arg2107His)                |
| 3337 |   | 19 | N | 2 | -/- |   | c.1609C>T (p.Arg537Cys)                         | c.6320G>A (p.Arg2107His)                |
| 3321 |   | 44 |   | 2 | -/- |   | c.2966T>C (p.Val989Ala)                         | c.6320G>A (p.Arg2107His)                |
| 4556 |   |    |   | 2 | -/- | x | c.2971G>C (p.Gly991Arg)                         | c.6320G>A (p.Arg2107His)                |
| 3092 |   | 25 | Y | 2 | -/- |   | c.4223G>T (p.Trp1408Leu)                        | c.6320G>A (p.Arg2107His)                |
| 3940 | x | 7  |   | 2 | -/- | x | c.428C>T (p.Pro143Leu)                          | c.6320G>A (p.Arg2107His)                |
| 3952 |   | 43 | Y | 2 | -/- | x | c.6079C>T (p.L2027Phe)                          | c.6320G>A (p.Arg2107His)                |
| 3191 |   |    |   | 2 | -/- |   | c.6229C>G (p.Arg2077Gly)                        | c.6320G>A (p.Arg2107His)                |
| Y415 |   |    |   | 2 | -/- |   | c.6316C>T (p.Arg2106Cys)                        | c.6320G>A (p.Arg2107His)                |
| 3794 |   | 60 | Y | 2 | -/- |   | c.6320G>A (p.Arg2107His)                        | c.6320G>A (p.Arg2107His)                |
| 3082 |   | 50 | Y | 2 | -/- |   | c.658C>T (p.Arg220Cys)                          | c.6320G>A (p.Arg2107His)                |
| 4360 |   |    |   | 2 | -/- |   | c.247_250dup (p.Ser84fs)                        | c.6320G>A (p.Arg2107His)                |
| 3760 |   | 8  | N | 2 | -/- |   | c.634C>T (p.Arg212Cys)                          | c.634C>T (p.Arg212Cys)                  |
| 3376 |   |    |   | 2 | -/- |   | c.454C>T (p.Arg152*)                            | c.6445C>T (p.Arg2149*)                  |
| 3562 | x |    |   | 2 | -/- |   | c.885del (p.Leu296fs)                           | c.1609C>T (p.Arg537Cys)                 |
| 3170 |   |    |   | 2 | -/- |   | c.885del (p.Leu296fs)                           | c.1609C>T (p.Arg537Cys)                 |
| 3397 |   |    |   | 2 | -/- |   | c.1805G>A (p.Arg602Gln)                         | c.1805G>A (p.Arg602Gln)                 |
| 3099 |   |    |   | 2 | -/- |   | c.4139C>T (p.Pro1380Leu)                        | c.5087G>A (p.Ser1696Asn)                |
| 3580 | x |    |   | 2 | -/- |   | c.5196+1G>A (p.?)                               | c.6703T>C (p.Ser2235Pro)                |
| 3182 | x |    |   | 2 | -/- |   | c.[1622T>C;3113C>T] (p.[Leu541Pro;Ala1038Val])  | c.2385C>G (p.Ser795Arg)                 |
| 4472 | x | 7  | N | 2 | -/- |   | c.[4222T>C;4918C>T] (p.[Trp1408Arg;Arg1640Trp]) | c.3056C>T (p.Thr1019Met)                |
| 3589 |   |    |   | 2 | -/- |   | c.3056C>T (p.Thr1019Met)                        | c.3056C>T (p.Thr1019Met)                |
| 3331 |   |    |   | 2 | -/- |   | c.1037A>C (p.Lys346Thr)                         | c.3350C>T (p.Thr1117Ile)                |
| 3489 |   |    |   | 2 | -/- |   | c.4036_4037del (p.Thr1346fs)                    | c.4036_4037del (p.Thr1346fs)            |
| 3424 | x |    |   | 2 | -/- |   | c.2564G>A (p.Trp855*)                           | c.4577C>T (p.Thr1526Met)                |

|      |   |    |   |   |     |   |                                                |                                                 |
|------|---|----|---|---|-----|---|------------------------------------------------|-------------------------------------------------|
| 3863 | x | 10 | N | 2 | -/- |   | c.4577C>T (p.Thr1526Met)                       | c.4577C>T (p.Thr1526Met)                        |
| 3240 | x |    |   | 2 | -/- |   | c.1222C>T (p.Arg408*)                          | c.5935del (p.Thr1979fs)                         |
| 3351 |   |    |   | 2 | -/- |   | c.4139C>T (p.Pro1380Leu)                       | c.5056G>A (p.Val1686Met)                        |
| 3474 | x |    |   | 2 | -/- |   | c.4537dup (p.Gln1513fs)                        | c.5056G>A (p.Val1686Met)                        |
| 3176 |   |    |   | 2 | -/- |   | c.2966T>C (p.Val989Ala)                        | c.5289delT (p.Val1764fs)                        |
| 3945 |   |    |   | 2 | -/- | x | c.2966T>C (p.Val989Ala)                        | c.5289delT (p.Val1764fs)                        |
| 3228 |   |    |   | 2 | -/- |   | c.5714+5G>A (p.?)                              | c.5917del (p.Val1973*)                          |
| 3692 | x |    |   | 2 | -/- |   | c.859-9T>C (p.?)                               | c.5917del (p.Val1973*)                          |
| 3227 |   |    |   | 2 | -/- |   | c.4524_4534del (p.Leu1509_Pro1511delfs)        | c.5917del (p.Val1973*)                          |
| 3107 | x |    |   | 2 | -/- |   | c.5714+5G>A (p.?)                              | c.5917del (p.Val1973*)                          |
| 3117 |   |    |   | 2 | -/- |   | c.5882G>A (p.Gly1961Glu)                       | c.5917del (p.Val1973*)                          |
| 9081 | x |    |   | 2 | -/- |   | c.2966T>C (p.Val989Ala)                        | c.5917del (p.Val1973*)                          |
| 3957 | x | 11 |   | 2 | -/- | x | c.5882G>A (p.Gly1961Glu)                       | c.5917del (p.Val1973*)                          |
| 9032 |   |    |   | 2 | -/- | x | c.71G>A (p.Arg24His)                           | c.1561del (p.Val521Serfs)                       |
| 3002 |   |    |   | 2 | -/- |   | c.1957C>T (p.Arg653Cys)                        | c.2966T>C (p.Val989Ala)                         |
| 3977 | x | 10 | N | 2 | -/- | x | c.1995C>A (p.Tyr665*)                          | c.2966T>C (p.Val989Ala)                         |
| 3510 |   | 39 | Y | 2 | -/- |   | c.2966T>C (p.Val989Ala)                        | c.2966T>C (p.Val989Ala)                         |
| 4338 |   |    |   | 2 | -/- |   | c.52C>T (p.Arg18Trp)                           | c.2966T>C (p.Val989Ala)                         |
| 3504 |   |    |   | 2 | -/- |   | c.1317G>A (p.Trp439*)                          | c.4347G>T (p.Trp1449Cys)                        |
| 3446 |   | 9  | N | 2 | -/- | x | c.4139C>T (p.Pro1380Leu)                       | c.4437G>A (p.Trp1479*)                          |
| 4225 |   | 12 | N | 2 | -/- |   | c.[1622T>C;3113C>T] (p.[Leu541Pro;Ala1038Val]) | c.5316G>A (p.Trp1772*)                          |
| 3769 |   | 8  | N | 2 | -/- |   | c.91T>C (p.Trp31Arg)                           | c.91T>C (p.Trp31Arg)                            |
| 3790 | x |    |   | 2 | -/- |   | c.93G>A (p.Trp31*)                             | c.93G>A (p.Trp31*)                              |
| 3687 |   | 13 | N | 2 | -/- |   | c.5018+2T>C (p.?)                              | c.6107A>G (p.Tyr2036Cys)                        |
| 9099 | x | 8  | N | 2 | -/- |   | c.[179C>T;3830C>T] (p.[Ala60Val;Thr1277Met])   | c.[179C>T;3830C>T] (p.[Ala60Val;Thr1277Met])    |
| 9040 |   |    |   | 2 | -/- |   | c.[2549A>G;5882G>A] (p.[Tyr850Cys;Gly1961Glu]) | c.[2549A>G;5882G>A] (p.[Tyr850Cys;Gly1961Glu])  |
| 3375 | x |    |   | 2 | -/- |   | c.[1622T>C;3113C>T] (p.[Leu541Pro;Ala1038Val]) | c.[1622T>C;3113C>T] (p.[Leu541Pro;Ala1038Val])  |
| 4574 | x | 5  | N | 2 | -/- |   | c.[1622T>C;3113C>T] (p.[Leu541Pro;Ala1038Val]) | c.[1622T>C;3113C>T] (p.[Leu541Pro;Ala1038Val])  |
| 3557 |   |    |   | 2 | -/- |   | c.[1622T>C;3113C>T] (p.[Leu541Pro;Ala1038Val]) | c.[1622T>C;3113C>T] (p.[Leu541Pro;Ala1038Val])  |
| 4580 |   | 7  | N | 2 | -/- |   | c.1529T>C (p.Leu510Pro)                        | c.[1622T>C;3113C>T] (p.[Leu541Pro;Ala1038Val])  |
| 3876 | x |    |   | 2 | -/- |   | c.3352C>T (p.His1118Tyr)                       | c.[4222T>C;4918C>T] (p.[Trp1408Arg;Arg1640Trp]) |
| 3335 |   |    |   | 2 | -/- |   | c.4139C>T (p.Pro1380Leu)                       | c.[4222T>C;4918C>T] (p.[Trp1408Arg;Arg1640Trp]) |
| 3085 | x |    |   | 2 | -/- |   | c.71G>A (p.Arg24His)                           | c.[4222T>C;4918C>T] (p.[Trp1408Arg;Arg1640Trp]) |
| 3080 |   | 30 | Y | 2 | -/- |   | c.[872C>T;1531C>T] (p.[Pro291Leu;Arg511Cys])   | c.[872C>T;1531C>T] (p.[Pro291Leu;Arg511Cys])    |
| 3542 |   | 43 | Y | 1 | ++  | x | c.1027_1028del (p.Asn343*)                     |                                                 |
| 3496 |   | 35 | Y | 1 | ++  | x | c.3754G>T (p.Glu1252*)                         |                                                 |
| 9097 | x | 32 | Y | 1 | ++  |   | c.5461-10T>C (p.?)                             |                                                 |
| 9013 |   | 35 | Y | 1 | ++  |   | c.4469G>A (p.Cys1490Tyr)                       |                                                 |
| Y522 |   |    |   | 1 | ++  | x | c.5461-10T>C (p.?)                             |                                                 |
| 3057 |   |    |   | 1 | ++  |   | c.5461-10T>C (p.?)                             |                                                 |
| 3087 |   | 30 | Y | 1 | ++  | x | c.5461-10T>C (p.?)                             |                                                 |

|      |   |    |   |   |     |   |                                                |
|------|---|----|---|---|-----|---|------------------------------------------------|
| 3452 |   | 46 | Y | 1 | ++  | x | c.5461-10T>C (p.?)                             |
| 3464 |   | 24 | Y | 1 | ++  | x | c.2069del (p.Gly690fs)                         |
| 3195 |   |    |   | 1 | ++  | x | c.5461-10T>C (p.?)                             |
| 3051 | x |    |   | 1 | +/- | x | c.4918C>T (p.Arg1640Trp)                       |
| 3426 | x | 32 | Y | 1 | +/- | x | c.5395A>G (p.Asn1799Asp)                       |
| 3094 | x |    |   | 1 | +/- | x | c.2588G>C (p.Gly863Ala)                        |
| 3286 | x | 42 | Y | 1 | +/- | x | c.4670A>G (p.Tyr1557Cys)                       |
| 3521 |   | 57 | Y | 1 | +/- | x | c.5461-10T>C (p.?)                             |
| 3064 |   |    |   | 1 | +/- |   | c.5461-10T>C (p.?)                             |
| 3584 |   | 30 | Y | 1 | +/- | x | c.655A>T (p.Arg219*)                           |
| 3601 | x | 22 | Y | 1 | +/- | x | c.[3481C>A;5714+5G>A] (p.[Arg1161Ser;?])       |
| 3495 | x | 10 | N | 1 | +/- | x | c.[1622T>C;3113C>T] (p.[Leu541Pro;Ala1038Val]) |
| 3531 |   | 43 | N | 1 | +/- | x | c.4249_4251del (p.Phe1417del)                  |
| 7203 | x | 52 | Y | 1 | +/- | x | c.247_250dup (p.Ser84fs)                       |
| 3100 | x |    | Y | 1 | +/- | x | c.161G>A (p.Cys54Tyr)                          |
| 3488 |   | 47 | Y | 1 | +/- | x | c.[1622T>C;3113C>T] (p.[Leu541Pro;Ala1038Val]) |
| 3671 | x |    | Y | 1 | +/- | x | c.571-1G>T (p.?)                               |
| 3767 | x | 50 | Y | 1 | +/- | x | c.6229C>T (p.Arg2077Trp)                       |
| 3892 | x | 20 | Y | 1 | +/- | x | c.1804C>T (p.Arg602Trp)                        |
| 3938 | x |    | Y | 1 | +/- | x | c.5196+1G>A (p.?)                              |
| 3381 | x | 45 | Y | 1 | +/- | x | c.2894A>G (p.Asn965Ser)                        |
| 3405 | x | 30 | Y | 1 | +/- | x | c.[1622T>C;3113C>T] (p.[Leu541Pro;Ala1038Val]) |
| 9007 |   |    | Y | 1 | +/- | x | c.4234C>T (p.Gln1412*)                         |
| 9011 |   | 45 | Y | 1 | +/- | x | c.1957C>T (p.Arg653Cys)                        |
| 9045 |   |    |   | 1 | +/- |   | c.5461-10T>C (p.?)                             |
| 9047 |   |    |   | 1 | +/- |   | c.6386+1G>A (p.?)                              |
| 9051 |   |    | Y | 1 | +/- |   | c.52C>T (p.Arg18Trp)                           |
| 9095 |   | 26 | N | 1 | +/- |   | c.262G>A (p.Gly88Arg)                          |
| 4546 |   | 10 |   | 1 | +/- | x | c.2588G>C (p.Gly863Ala)                        |
| 3422 |   |    |   | 1 | +/- | x | c.3328+1G>A (p.?)                              |
| 4512 |   |    | Y | 1 | +/- |   | c.4234C>T (p.Gln1412*)                         |
| 3357 |   | 48 | Y | 1 | +/- | x | c.[1622T>C;3113C>T] (p.[Leu541Pro;Ala1038Val]) |
| 3293 |   |    |   | 1 | +/- | x | c.[1622T>C;3113C>T] (p.[Leu541Pro;Ala1038Val]) |
| 3028 |   | 13 | N | 1 | +/- |   | c.2894A>G (p.Asn965Ser)                        |
| 3704 |   | 50 | Y | 1 | +/- | x | c.4139C>T (p.Pro1380Leu)                       |
| 3766 |   | 31 | Y | 1 | +/- | x | c.1921T>C (p.Cys641Arg)                        |
| 3429 |   | 27 | Y | 1 | +/- | x | c.4918C>T (p.Arg1640Trp)                       |
| 3361 |   | 28 | Y | 1 | +/- | x | c.6166A>T (p.Lys2056*)                         |
| 3127 |   | 52 | Y | 1 | +/- | x | c.3846del (p.Gly1283fs)                        |
| 3046 |   |    |   | 1 | +/- |   | c.6386+2C>G (p.?)                              |
| 3527 |   | 46 |   | 1 | +/- | x | c.161G>A (p.Cys54Tyr)                          |

|      |   |    |   |   |     |   |                                                 |
|------|---|----|---|---|-----|---|-------------------------------------------------|
| 4115 |   | 44 |   | 1 | +/- | x | c.1222C>T (p.Arg408*)                           |
| 3813 |   | 40 | Y | 1 | +/- | x | c.868C>T (p.Arg290Trp)                          |
| 3110 |   | 36 |   | 1 | +/- | x | c.6543_6578del (p.Leu2182_Phe2193del)           |
| 4594 |   | 35 | Y | 1 | +/- |   | c.4139C>T (p.Pro1380Leu)                        |
| 3245 |   | 22 | N | 1 | +/- | x | c.[1622T>C;3113C>T] (p.[Leu541Pro;Ala1038Val])  |
| 3862 |   | 71 | Y | 1 | +/- | x | c.1903C>T (p.Gln635*)                           |
| 3803 |   | 67 | Y | 1 | +/- | x | c.3261A>C (p.Glu1087Asp)                        |
| 3098 |   | 52 | Y | 1 | +/- | x | c.161-1G>A (p.?)                                |
| 3485 |   | 48 | Y | 1 | +/- | x | c.5923G>C (p.Gly1975Arg)                        |
| 3456 |   | 40 | Y | 1 | +/- | x | c.3259G>A (p.Glu1087Lys)                        |
| 3089 |   | 40 | Y | 1 | +/- | x | c.[1622T>C;3113C>T] (p.[Leu541Pro;Ala1038Val])  |
| 3903 |   | 32 | Y | 1 | +/- | x | c.45G>A (p.Trp15*)                              |
| 3123 |   | 31 | Y | 1 | +/- | x | c.3812A>G (p.Glu1271Gly)                        |
| 3492 |   | 29 | Y | 1 | +/- | x | c.6229C>T (p.Arg2077Trp)                        |
| 3162 |   | 21 | Y | 1 | +/- | x | c.1906C>T (p.Gln636*)                           |
| 3159 |   | 18 | Y | 1 | +/- | x | c.5461-10T>C (p.?)                              |
| 3450 |   |    |   | 1 | +/- | x | c.[4222T>C;4918C>T] (p.[Trp1408Arg;Arg1640Trp]) |
| 3045 |   |    |   | 1 | +/- | x | c.247_250dup (p.Ser84fs)                        |
| 3020 |   |    |   | 1 | +/- |   | c.[1622T>C;3113C>T] (p.[Leu541Pro;Ala1038Val])  |
| 3008 | x |    |   | 1 | -/- |   | c.3148G>A (p.Gly1050Ser)                        |
| 3032 | x |    |   | 1 | -/- | x | c.[735T>G;2300T>A] (p.[Tyr245*;Val767Asp])      |
| 3073 | x |    |   | 1 | -/- | x | c.3148G>A (p.Gly1050Ser)                        |
| 3037 | x |    |   | 1 | -/- | x | c.[5882G>A;6445C>T] (p.[Gly1961Glu;Arg2149*])   |
| 3468 | x |    |   | 1 | -/- | x | c.5714+5G>A (p.?)                               |
| 3268 |   | 42 | Y | 1 | -/- | x | c.4248C>A (p.Phe1416Leu)                        |
| 3520 |   | 59 | Y | 1 | -/- | x | c.5714+5G>A (p.?)                               |
| 3316 |   |    |   | 1 | -/- | x | c.247_250dup (p.Ser84fs)                        |
| 3532 |   | 57 | Y | 1 | -/- | x | c.3043T>C (p.Phe1015Leu)                        |
| 3603 |   |    |   | 1 | -/- | x | c.5714+5G>A (p.?)                               |
| 4367 |   |    |   | 1 | -/- | x | c.2971G>C (p.Gly991Arg)                         |
| 3609 | x |    |   | 1 | -/- | x | c.6320G>A (p.Arg2107His)                        |
| 3487 |   |    |   | 1 | -/- | x | c.4918C>T (p.Arg1640Trp)                        |
| 3706 |   | 16 | N | 1 | -/- | x | c.2966T>C (p.Val989Ala)                         |
| 3733 | x |    |   | 1 | -/- | x | c.4577C>T (p.Thr1526Met)                        |
| 3832 | x |    | N | 1 | -/- | x | c.5882G>A (p.Gly1961Glu)                        |
| 4565 | x |    | N | 1 | -/- | x | c.733T>C (p.Tyr245His)                          |
| 3982 | x |    |   | 1 | -/- |   | c.4793C>A (p.Ala1598Asp)                        |
| 3999 | x |    |   | 1 | -/- |   | c.5882G>A (p.Gly1961Glu)                        |
| 3150 | x | 22 | Y | 1 | -/- | x | c.3322C>T (p.Arg1108Cys)                        |
| 4638 | x |    |   | 1 | -/- |   | c.5761G>A (p.Val1921Met)                        |
| 9066 | x |    |   | 1 | -/- |   | c.3292C>T (p.Arg1098Cys)                        |

|      |   |    |   |   |     |   |                                                 |
|------|---|----|---|---|-----|---|-------------------------------------------------|
| 9096 | x |    |   | 1 | -/- |   | c.5882G>A (p.Gly1961Glu)                        |
| 9017 |   |    |   | 1 | -/- | x | c.4353-4T>C (p.?)                               |
| Y256 |   |    |   | 1 | -/- | x | c.634C>T (p.Arg212Cys)                          |
| 5360 |   |    |   | 1 | -/- | x | c.5882G>A (p.Gly1961Glu)                        |
| 4720 |   |    | N | 1 | -/- |   | c.6089G>A (p.Arg2030Gln)                        |
| 3297 |   |    |   | 1 | -/- | x | c.5882G>A (p.Gly1961Glu)                        |
| 3943 |   | 28 | Y | 1 | -/- | x | c.2616del (p.Leu274fs)                          |
| 3363 |   |    |   | 1 | -/- | x | c.161G>A (p.Cys54Tyr)                           |
| 3056 |   |    |   | 1 | -/- |   | c.3113C>T(p.Ala1038Val)                         |
| 3118 |   | 44 | Y | 1 | -/- | x | c.6320G>A (p.Arg2107His)                        |
| 3133 |   | 41 | Y | 1 | -/- | x | c.5312+1G>A (p.?)                               |
| 3901 |   | 10 | Y | 1 | -/- | x | c.3113C>T(p.Ala1038Val)                         |
| 5222 |   |    | N | 1 | -/- | x | c.2966T>C (p.Val989Ala)                         |
| 4632 |   |    | N | 1 | -/- |   | c.[1622T>C;3113C>T] (p.[Leu541Pro;Ala1038Val])  |
| 4391 |   |    |   | 1 | -/- | x | c.6229C>T (p.Arg2077Trp)                        |
| 3944 |   |    |   | 1 | -/- | x | c.2041C>T (p.Arg681*)                           |
| 3579 |   |    |   | 1 | -/- | x | c.6320G>A (p.Arg2107His)                        |
| 4120 |   |    |   | 1 | -/- | x | c.5881G>A (p.Gly1961Arg)                        |
| 3278 |   |    |   | 1 | -/- | x | c.6694G>A (p.Glu2232Lys)                        |
| 4203 |   |    |   | 1 | -/- | x | c.634C>T (p.Arg212Cys)                          |
| 3898 |   |    |   | 1 | -/- | x | c.1034A>G (p.Tyr345Cys)                         |
| 3315 |   |    |   | 1 | -/- | x | c.6088C>T (p.Arg2030*)                          |
| 4541 |   |    |   | 1 | -/- | x | c.1699G>A (p.Val567Met)                         |
| 3103 |   |    |   | 1 | -/- | x | c.184C>T (p.Pro62Ser)                           |
| 3327 |   |    |   | 1 | -/- | x | c.[3758C>T;5882G>A] (p.[Thr1253Met;Gly1961Glu]) |
| 3740 |   |    |   | 1 | -/- | x | c.4577C>T (p.Thr1526Met)                        |
| 5056 |   |    |   | 1 | -/- |   | c.6320G>A (p.Arg2107His)                        |
| 3018 |   |    |   | 1 | -/- |   | c.4139C>T (p.Pro1380Leu)                        |
| 3636 |   | 37 |   | 0 | ++  |   |                                                 |
| 3212 | x |    |   | 0 | +/- |   |                                                 |
| 3119 | x | 47 | Y | 0 | +/- | x |                                                 |
| 3834 | x | 24 | Y | 0 | +/- |   |                                                 |
| 3939 | x | 13 | N | 0 | +/- | x |                                                 |
| 9093 |   | 22 | N | 0 | +/- |   |                                                 |
| Y382 |   |    |   | 0 | +/- |   |                                                 |
| Y394 |   |    |   | 0 | +/- |   |                                                 |
| Y458 |   |    |   | 0 | +/- |   |                                                 |
| Y533 |   |    |   | 0 | +/- |   |                                                 |
| 3992 |   | 10 | N | 0 | +/- |   |                                                 |
| 3314 |   | 50 | Y | 0 | +/- |   |                                                 |
| 3280 |   | 14 | Y | 0 | +/- |   |                                                 |

|      |   |    |   |   |     |   |
|------|---|----|---|---|-----|---|
| 3120 |   |    | Y | 0 | +/- |   |
| 3161 |   | 44 | Y | 0 | +/- |   |
| 3967 |   | 3  | N | 0 | +/- | x |
| 3163 |   |    | N | 0 | +/- |   |
| 3325 |   |    |   | 0 | +/- |   |
| 3194 |   |    |   | 0 | -/- |   |
| 3224 |   |    |   | 0 | -/- |   |
| 3247 | x |    |   | 0 | -/- |   |
| 3414 | x |    |   | 0 | -/- |   |
| 3459 | x |    |   | 0 | -/- |   |
| 3497 |   |    | Y | 0 | -/- |   |
| 3530 | x |    | Y | 0 | -/- |   |
| 3746 | x |    | Y | 0 | -/- |   |
| 3768 | x |    | Y | 0 | -/- |   |
| 4629 | x |    |   | 0 | -/- |   |
| 7124 |   |    |   | 0 | -/- |   |
| 7728 |   |    |   | 0 | -/- |   |
| 9003 |   |    | N | 0 | -/- | x |
| 9052 |   |    | N | 0 | -/- |   |
| 4618 |   |    | N | 0 | -/- |   |
| 4270 |   |    |   | 0 | -/- |   |
| 4184 |   |    |   | 0 | -/- |   |
| 4205 |   |    |   | 0 | -/- |   |
| 4201 |   |    |   | 0 | -/- |   |
| 3294 |   |    |   | 0 | -/- |   |
| 3307 |   |    |   | 0 | -/- |   |
| 3239 |   |    |   | 0 | -/- |   |
| 3795 |   |    | N | 0 | -/- |   |
| 3796 |   |    |   | 0 | -/- |   |
| 3797 |   |    |   | 0 | -/- |   |
| 3362 |   |    |   | 0 | -/- |   |
| 3189 |   |    |   | 0 | -/- |   |
| 3132 |   |    | N | 0 | -/- |   |
| 3643 |   |    | N | 0 | -/- |   |
| 3948 |   |    | N | 0 | -/- | x |
| 3949 |   |    | N | 0 | -/- | x |
| 3088 |   |    | Y | 0 | -/- | x |
| 3281 |   |    | Y | 0 | -/- |   |
| 3659 |   |    |   | 0 | -/- |   |
| 3726 |   |    |   | 0 | -/- |   |
| 3053 |   |    |   | 0 | -/- |   |
| 4172 |   |    |   | 0 | -/- |   |

|      |   |     |   |
|------|---|-----|---|
| 3396 | 0 | -/- | x |
| 3029 | 0 | -/- |   |
| 3034 | 0 | -/- |   |
| 3041 | 0 | -/- |   |
| 3069 | 0 | -/- |   |
| 3111 | 0 | -/- |   |
| 3131 | 0 | -/- |   |
| 3135 | 0 | -/- |   |
| 3144 | 0 | -/- |   |
| 3145 | 0 | -/- |   |
| 3157 | 0 | -/- |   |
| 3165 | 0 | -/- |   |
| 3166 | 0 | -/- |   |
| 3205 | 0 | -/- |   |
| 3206 | 0 | -/- |   |
| 3223 | 0 | -/- |   |
| 3251 | 0 | -/- |   |
| 3282 | 0 | -/- |   |
| 3296 | 0 | -/- |   |
| 3311 | 0 | -/- |   |
| 3369 | 0 | -/- |   |
| 3370 | 0 | -/- |   |
| 3372 | 0 | -/- |   |
| 3374 | 0 | -/- |   |
| 3377 | 0 | -/- |   |
| 3383 | 0 | -/- |   |
| 3393 | 0 | -/- |   |
| 3404 | 0 | -/- |   |
| 3448 | 0 | -/- |   |
| 3554 | 0 | -/- |   |
| 3555 | 0 | -/- |   |
| 3558 | 0 | -/- |   |
| 3560 | 0 | -/- |   |
| 3552 | 0 | -/- |   |



# Unifocal Atrophy with Lesion-Centric Flecks

c.5603A>T (p.Asn1868Ile)

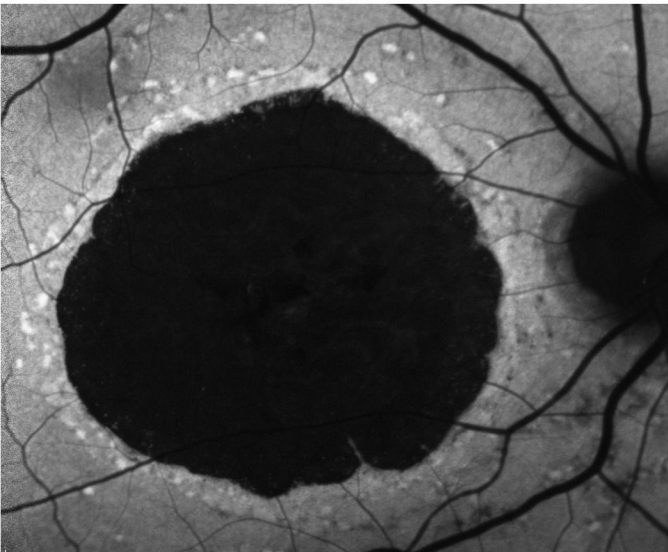

c.5882G>A (p.Gly1961Glu)

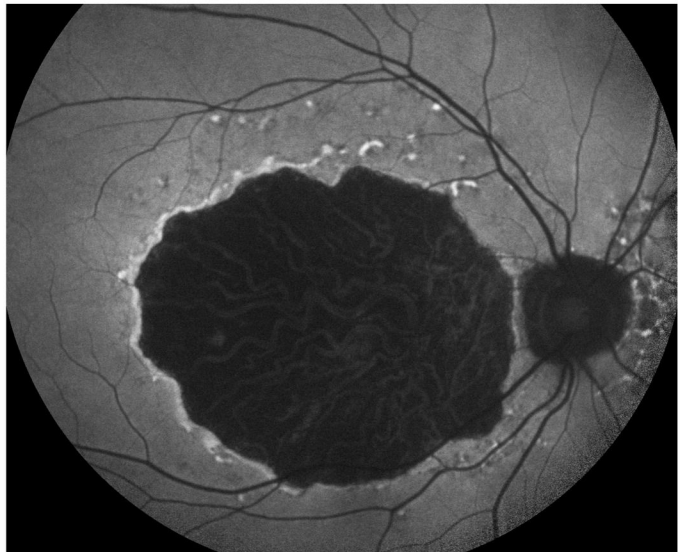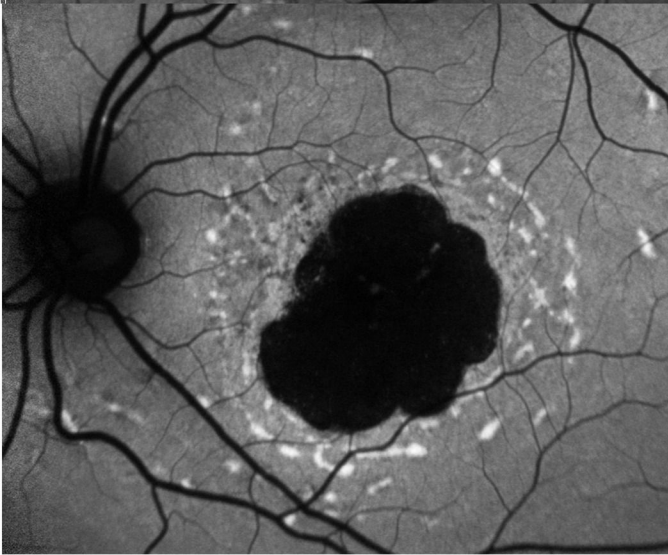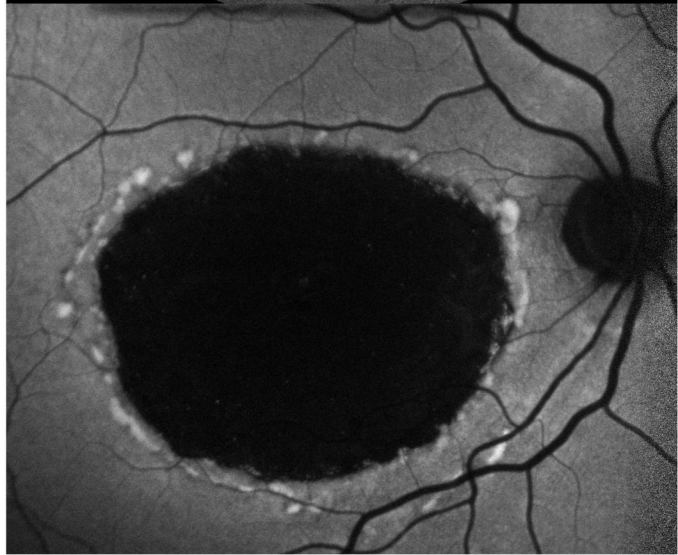

Supplement: NIHMS935157-supplement-supplement_1.pdf [file NIHMS935157-supplement-supplement_1.pdf]
